# Chemoenzymatic Generation of Phospholipid Membranes Mediated by Type I Fatty Acid Synthase

Satyam Khanal,<sup>†</sup> Roberto J. Brea,<sup>†</sup> Michael D. Burkart<sup>\*,†</sup>, Neal K. Devaraj<sup>\*,†</sup>

<sup>†</sup>Department of Chemistry and Biochemistry, University of California, San Diego, La Jolla, CA 92093, USA.

## ABSTRACT

The *de novo* formation of lipid membranes from minimal reactive precursors is a major goal in synthetic cell research. In nature, the synthesis of membrane phospholipids is orchestrated by numerous enzymes, including fatty acid synthases and membrane-bound acyltransferases. However, these enzymatic pathways are difficult to fully reproduce *in vitro*. As such, the reconstitution of phospholipid membrane synthesis from simple metabolic building blocks remains a challenge. Here, we describe a chemoenzymatic strategy for lipid membrane generation that utilizes a soluble bacterial fatty acid synthase (cgFAS I) to synthesize palmitoyl-CoA *in situ* from acetyl-CoA and malonyl-CoA. The fatty acid derivative spontaneously reacts with a cysteine-modified lysophospholipid by native chemical ligation (NCL), affording a non-canonical amidophospholipid that self-assembles into micron-sized membrane-bound vesicles. To our knowledge, this is the first example of reconstituting phospholipid membrane formation directly from acetyl-CoA and malonyl-CoA precursors. Our results demonstrate that combining the specificity and efficiency of a type I fatty acid synthase with a highly selective bioconjugation reaction provides a biomimetic route for the *de novo* formation of membrane-bound vesicles.

All living organisms use phospholipid membranes to control the exchange of materials with the extracellular matrix, isolate and protect sensitive chemical reactions, and maintain homeostasis inside cells.<sup>1</sup> Furthermore, cells require phospholipid membranes for energy production, membrane protein synthesis, and cell signaling.<sup>2,3</sup> Phospholipids are enzymatically generated by membrane-bound acyl-transferases as part of the Kennedy lipid synthesis pathway.<sup>4,5</sup> The fatty acids needed for these biochemical reactions are in turn made by fatty acid synthases (FASs). FASs are ubiquitous proteins that catalyze the synthesis of fatty acids in a highly efficient manner through modularization of enzymatic functions and the use of carrier-mediated substrate shuttling.<sup>6</sup> Through coordinated action, the different enzymatic modules of the FAS biosynthesize an elongated acyl chain of a specific length. Typical fatty acid products of FASs are palmitic, stearic and oleic acid.<sup>7-9</sup>

Drawing inspiration from the biochemical pathways for phospholipid synthesis, various research groups have devised strategies for the bottom-up construction of phospholipid membranes.<sup>10-12</sup> Although recent studies have shown that phospholipids can be generated abiotically using chemical coupling reactions,<sup>13,14</sup> the alkyl chains are typically synthesized in advance and provided externally. Currently, there are no known biomimetic strategies that synthesize phospholipids *de novo* by coupling *in situ* formed fatty acid tails with single-chain amphiphiles. Instead of externally adding alkyl species, we sought to harness a FAS for the formation of activated fatty acids from simple metabolic building blocks such as acetyl-CoA and malonyl-CoA. Subsequently, the activated fatty acids could chemically react with lipid precursors to form phospholipid membranes. Such a chemoenzymatic scheme would better mimic biological phospholipid synthesis compared to previous synthetic strategies and would enable the use of very short chain acyl-CoAs to drive membrane formation. Here, we employ a bacterial type I FAS

(cgFAS I), in combination with native chemical ligation (NCL), to spontaneously generate membrane-forming synthetic phospholipids from simple water-soluble fatty acid precursors (Figure 1). Our chemoenzymatic approach enables *de novo* membrane formation, that is membrane formation in the absence of preexisting membranes. Chemoenzymatic phospholipid formation may provide simpler strategies to generate membrane compartments in synthetic cells,<sup>10,13,15,16</sup> support the advancement of methods for reconstituting membrane proteins,<sup>17,18</sup> and facilitate the synthesis of natural and non-canonical lipids.<sup>19</sup>

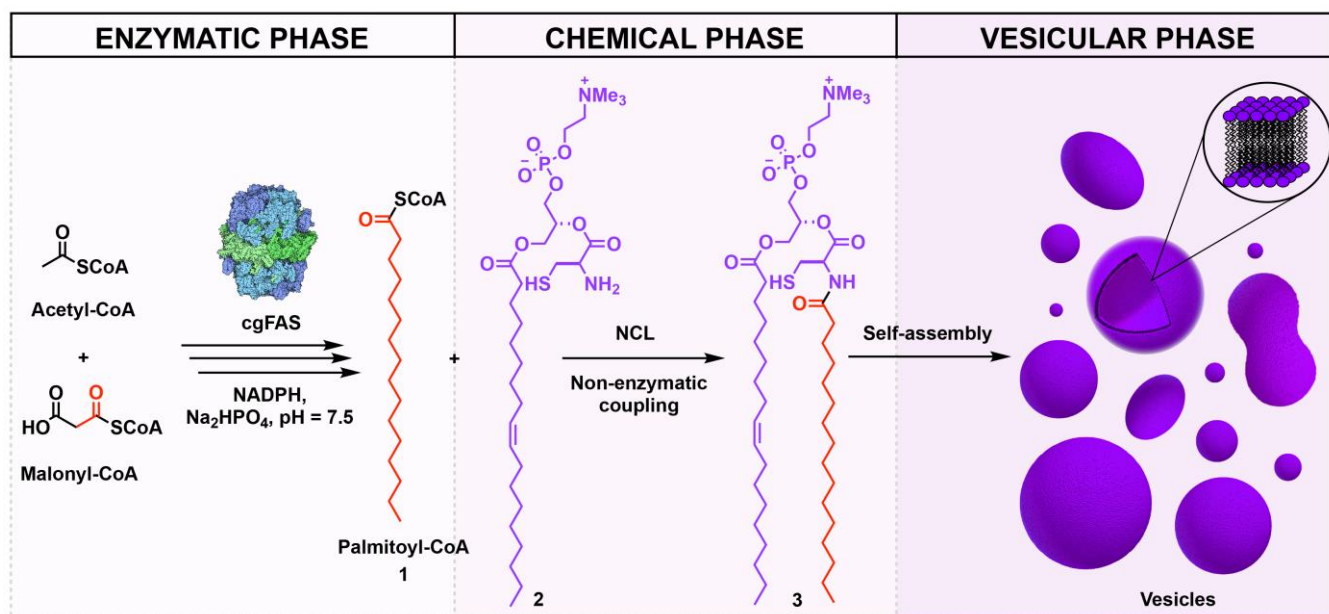

Figure 1. Schematic representation of FAS-mediated chemoenzymatic phospholipid synthesis. A bacterial type I FAS synthesizes palmitoyl-CoA **1** *in situ* using acetyl-CoA, malonyl-CoA and NADPH. **1** subsequently reacts with cysteine-modified lysophospholipid **2** via native chemical ligation (NCL) to form phospholipid **3**, which spontaneously self-assembles into membrane-bound vesicles.

We first identified an appropriate FAS for the *in situ* formation of activated fatty acids. While type II FASs are comprised of multiple enzymes working in a coordinated fashion, type I FASs consist of a single multi-enzyme complex with catalytic domains that interact with each other in a cooperative manner to form fatty acids.<sup>6</sup> Through iterative cycles, a type I FAS utilizes acetyl-CoA and malonyl-CoA to produce medium-chain fatty acids in a stoichiometric fashion (Figure 2A). We considered that a type I FAS would be an ideal enzyme for our system as it would require reconstituting a single multi-domain protein. Additionally, some type I FASs, such as yeast and bacterial FASs, produce fatty acyl-CoA as their final product.<sup>7</sup> As coenzyme A is a good leaving group, we reasoned that the bacterial type I FAS would be an appropriate enzyme for generating activated fatty acid products that could be efficiently coupled with appropriate thioester-reactive lysophospholipids to form non-canonical phospholipids *in situ*. We chose to work with type I FAS B from *Corynebacterium glutamicum* (cgFAS I) as it has been shown to primarily produce palmitoyl-CoA<sup>20</sup> (Figure 2A) and has been efficiently expressed in *E. coli*.<sup>21</sup>



(Scheme S1B, Figure S4). Using calibration curves, we determined that 820  $\mu\text{M}$  of phospholipid **3** was formed after 3 h, corresponding to a yield of 82%.

In previous work, we have observed that amphiphilic species are preferentially acylated by amphiphilic reactants, likely promoted by co-assembly in micelles or membranes.<sup>13,15,22</sup> To better understand the role self-assembly plays in the formation of the phospholipid product, we investigated the reactivity of lysophospholipid **2** with non-amphiphilic small-chain thioesters. Malonyl- and acetyl-CoA were selected as reactive thioester partners with **2**. Although both substrates contain a reactive thioester moiety that can react by NCL with cysteine-modified lysophospholipid **2**, the absence of a long-chain hydrophobic tail precludes assembly into structures such as micelles. Therefore, we anticipated a difference in their reactivity with **2** in comparison to the previously tested palmitoyl-CoA **1**. As expected, when we attempted to react **2** with malonyl- or acetyl-CoA under our standard NCL reaction conditions, we were unable to detect product formation (Figure S5).

To determine the ability of non-canonical phospholipid **3** to form membrane-bound vesicles, microscopy studies were performed. Neither palmitoyl-CoA **1** nor lysophospholipid **2** formed membranes in aqueous solution. On the other hand, phospholipid **3** readily formed membrane-bound assemblies when hydrated (Figure 3). Lipid vesicles were initially identified by phase-contrast (Figure 3A) and fluorescence microscopy using the membrane-staining dye BODIPY-FL DHPE (Figure 3B, Figure S6A). Under these conditions, vesicles of 1-10  $\mu\text{m}$  diameter were observed after hydration and tumbling of **3** in phosphate buffer, pH 7.4 at 37  $^{\circ}\text{C}$  for 1 h. Transmission electron microscopy (TEM) also corroborated the formation of vesicular structures (Figure 3C). The encapsulation ability of the phospholipid vesicles was demonstrated by hydrating a thin lipid film of **3** in the presence of 8-hydroxypyrene-1,3,6-trisulfonic acid (HPTS), a highly polar fluorescent dye, followed by removal of excess dye by spin-filtration and vesicle characterization using fluorescence microscopy (Figure 3D, Figure S6B).

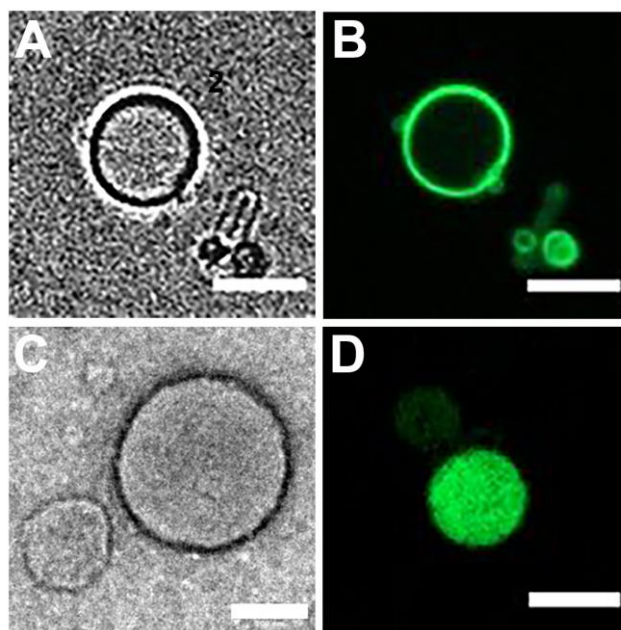

Figure 3. Characterization of phospholipid **3** vesicular structures. A) Phase-contrast microscopy image of membrane-bound vesicles resulting from the self-assembly of **3**. Scale bar denotes 5  $\mu\text{m}$ . B) Fluorescence microscopy image of vesicles formed by hydration of a thin film of **3**. Membranes were stained with 0.1 mol % BODIPY-FL DHPE. Scale bar denotes 5  $\mu\text{m}$ . C) TEM image of negatively stained vesicles of **3**. Scale bar denotes 100 nm. D) Fluorescence microscope image demonstrating the encapsulation of HPTS in vesicles of **3**. Scale bar denotes 5  $\mu\text{m}$ .

Having characterized the individual enzymatic and chemical reactions, we next explored combining enzymatic palmitoyl-CoA **1** synthesis with chemical phospholipid **3** synthesis in a one-pot reaction (Figure 4). Briefly, we added lysophospholipid **2** (400  $\mu$ M) to 10 mM phosphate ( $\text{Na}_2\text{HPO}_4/\text{NaH}_2\text{PO}_4$ ) buffer, pH 7.4 containing cgFAS I (1  $\mu$ M), acetyl-CoA (1 mM), malonyl-CoA (1 mM) and NADPH (10 mM) along with 10 mM (TCEP) at 37  $^\circ\text{C}$ . Phospholipid formation was followed using HPLC-MS-ELSD measurements. Optimization of the reaction conditions enabled rapid coupling between cgFAS I generated **1** and **2**. The one-pot reaction afforded the corresponding phospholipid **3** as the prominent product within 30 min (Figure 4A). All of lysophospholipid **2** was consumed in less than 4 h (Figure 4 B) to afford 367  $\mu$ M of phospholipid **3**. After 30 min of reaction, small vesicular structures were detected by fluorescence microscopy using BODIPY-FL DHPE (Figure S7A). After leaving the reaction tumbling overnight at 37  $^\circ\text{C}$ , we observed larger vesicles in the range of 1-2  $\mu\text{m}$  in diameter (Figure 4C, Figure S7B). We next investigated the one-pot chemoenzymatic formation of membranes in the presence of biologically relevant cell membrane components, including cholesterol<sup>23</sup>, ionic small molecules such as guanidine hydrochloride (GuHCl)<sup>24-26</sup>, and short-chain alkanols such as decanol<sup>27</sup>. We added cholesterol (400  $\mu$ M), GuHCl (400  $\mu$ M) and 1-decanol (400  $\mu$ M) to the one-pot *in situ* chemoenzymatic reaction forming phospholipid **3**. We observed that the additives did not perturb the formation of phospholipid **3** membranes, and, if anything, led to the formation of larger vesicles. Vesicles were stable over 48 h at 37  $^\circ\text{C}$ , as observed by fluorescence microscopy using BODIPY-FL DHPE (Figure 4D).

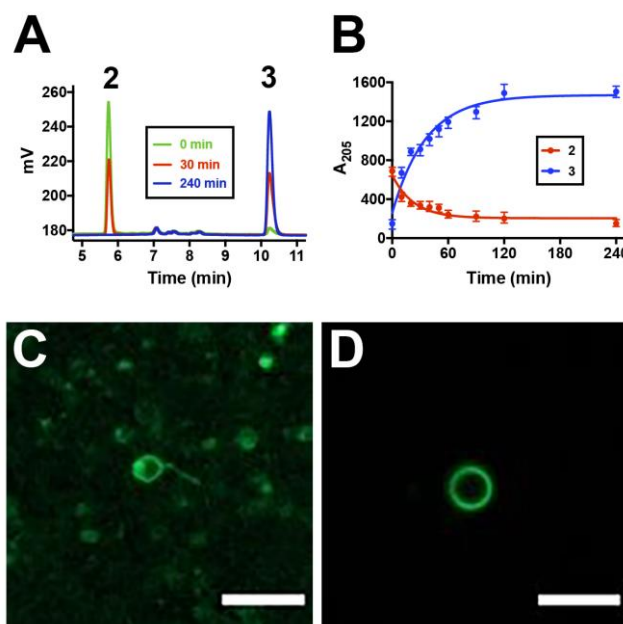

Figure 4. One-pot chemoenzymatic formation and self-assembly of phospholipid **3**. A) HPLC traces corresponding to the NCL-based synthesis of phospholipid **3** from enzymatically generated **1** and lysophospholipid **2**. B) Kinetic curves of lysophospholipid **2** consumption and phospholipid **3** formation during one-pot synthesis. C) Fluorescence microscopy image of phospholipid **3** vesicles after 4 h of chemoenzymatic reaction. D) Fluorescence microscopy image of chemoenzymatically formed vesicles of **3** in the presence of GuHCl, decanol and cholesterol. Membranes were stained with 0.1 mol % BODIPY-FL DHPE. Scale bar denotes 5  $\mu\text{m}$ .

In summary, we have developed a chemoenzymatic route to synthesize non-canonical phospholipids from water-soluble precursors. We showed that palmitoyl-CoA generated *in situ* by bacterial type I FAS effectively couples with a cysteine-modified lysophospholipid. The resulting phospholipid synthesis triggers *de novo* formation of membrane-bound vesicles. Given our approach, there should be flexibility to diversify the lipid species generated in the reaction. Even though we utilized cgFAS I to selectively produce palmitoyl-CoA, the use of fatty acid synthases from other organisms could enable the formation of a

diverse array of fatty acyl-CoA species, which could be subsequently coupled to reactive lysophospholipids to give several non-canonical lipid species. For instance, many bacterial FAS are known to synthesize terminally branched iso-, anteiso-, or omega-alicyclic fatty acids from branched, short-chain carboxylic acid precursors such as methylmalonyl-CoA.<sup>7,28,29</sup> We plan on utilizing the *in situ* synthesis of diverse phospholipid species to facilitate investigations of how lipid membrane composition affects vesicle assembly, growth and division.

## AUTHOR INFORMATION

### Corresponding Authors

**Neal K. Devaraj** – Department of Chemistry and Biochemistry, University of California, San Diego, CA 92093, USA; [orcid.org/0000-0002-8033-9973](https://orcid.org/0000-0002-8033-9973); Email: [ndevaraj@ucsd.edu](mailto:ndevaraj@ucsd.edu)

**Michael D. Burkart** – Department of Chemistry and Biochemistry, University of California, San Diego, CA 92093, USA; [orcid.org/0000-0002-4472-2254](https://orcid.org/0000-0002-4472-2254); Email: [mburkart@ucsd.edu](mailto:mburkart@ucsd.edu)

### Authors

**Satyam Khanal** – Department of Chemistry and Biochemistry, University of California, San Diego, CA 92093, USA; [orcid.org/0000-0001-5720-0044](https://orcid.org/0000-0001-5720-0044); Email: [skhanal@ucsd.edu](mailto:skhanal@ucsd.edu)

**Roberto J. Brea** – Department of Chemistry and Biochemistry, University of California, San Diego, CA 92093, USA; [orcid.org/0000-0002-0321-0156](https://orcid.org/0000-0002-0321-0156); Email: [rbreafernandez@ucsd.edu](mailto:rbreafernandez@ucsd.edu)

### Notes

The authors declare no competing financial interest.

## ACKNOWLEDGMENT

This material is based upon work supported by the National Science Foundation (EF-1935372) and the Department of Defense (Army Research Office) through the MURI program (W911NF-13-1-0383). We sincerely thank Prof. Jay Keasling (University of California, Berkeley) for generously providing us the plasmid for the type I FAS B from *Corynebacterium glutamicum* (cgFAS I). We thank Prof. Itay Budin (University of California, San Diego) and Prof. Martin Grininger (Goethe University Frankfurt) for helpful discussions. Satyam Khanal acknowledges support from a Roger Tsien Fellowship through UCSD.

## REFERENCES

- (1) Alberts, B.; Johnson, A.; Lewis, J.; Raff, M.; Roberts, K.; Walter, P. *Molecular Biology of the Cell (4<sup>th</sup> Edition)*, Garland Science, New York (USA), **2002**.
- (2) Sunshine, H.; Iruela-Arispe, M. L. Membrane Lipids and Cell Signaling. *Curr. Opin. Lipidol.* **2017**, *28*, 408-413.
- (3) Goñi, F. M. The Basic Structure and Dynamics of Cell Membranes: An Update of the Singer-Nicolson Model. *BBA - Biomembranes* **2014**, *1838*, 1467-1476.
- (4) Yao, J.; Rock, C. O. Phosphatidic Acid Synthesis in Bacteria. *BBA - Mol. Cell Biol. L.* **2013**, *1831*, 495-502.
- (5) Yamashita, A.; Sugiura, T.; Waku, K. Acyltransferases and Transacylases Involved in Fatty Acid Remodeling of Phospholipids and Metabolism of Bioactive Lipids in Mammalian Cells. *J. Biochem.* **1997**, *122*, 1-16.
- (6) Maier, T.; Leibundgut, M.; Boehringer, D.; Ban, N. Structure and Function of Eukaryotic Fatty Acid Synthases. *Q. Rev. Biophys.* **2010**, *43*, 373-422.
- (7) Schweizer, E.; Hofmann, J. Microbial Type I Fatty Acid Synthases (FAS): Major Players in a Network of Cellular FAS Systems. *Microbiol. Mol. Biol. Rev.* **2004**, *68*, 501-517.

- (8) Rittner, A.; Paithankar, K. S.; Drexler, D. J.; Himmler, A.; Grninger, M. Probing the Modularity of Megasyntases by Rational Engineering of a Fatty Acid Synthase Type I: Probing the Modularity of Megasyntases by Rational Engineering of a Fatty Acid Synthase Type I. *Protein Sci.* **2019**, *28*, 414-428.
- (9) Chen, A.; Re, R. N.; Burkart, M. D. Type II Fatty Acid and Polyketide Synthases: Deciphering Protein-Protein and Protein-Substrate Interactions. *Nat. Prod. Rep.* **2018**, *35*, 1029-1045.
- (10) Brea, R. J.; Cole, C. M.; Devaraj, N. K. In Situ Vesicle Formation by Native Chemical Ligation. *Angew. Chem. Int. Ed.* **2014**, *53*, 14102-14105.
- (11) Matsuo, M.; Ohyama, S.; Sakurai, K.; Toyota, T.; Suzuki, K.; Sugawara, T. A Sustainable Self-Reproducing Liposome Consisting of a Synthetic Phospholipid. *Chem. Phys. Lipids* **2019**, *222*, 1-7.
- (12) Xiong, F.; Lu, L.; Sun, T. Y.; Wu, Q.; Yan, D.; Chen, Y.; Zhang, X.; Wei, W.; Lu, Y.; Sun, W. Y.; Li, J. J.; Zhao, J. A Bioinspired and Biocompatible Ortho-Sulfiliminy Phenol Synthesis. *Nat. Commun.* **2017**, *8*, 15912.
- (13) Budin, I.; Devaraj, N. K. Membrane Assembly Driven by a Biomimetic Coupling Reaction. *J. Am. Chem. Soc.* **2012**, *134*, 751-753.
- (14) Flores, J.; White, B. M.; Brea, R. J.; Baskin, J. M.; Devaraj, N. K. Lipids: Chemical Tools for Their Synthesis, Modification, and Analysis. *Chem. Soc. Rev.* **2020**, *49*, 4602-4614.
- (15) Brea, R. J.; Bhattacharya, A.; Devaraj, N. K. Spontaneous Phospholipid Membrane Formation by Histidine Ligation. *Synlett* **2017**, *28*, 108-112.
- (16) Bhattacharya, A.; Brea, R. J.; Devaraj, N. K. *De Novo* Vesicle Formation and Growth: An Integrative Approach to Artificial Cells. *Chem. Sci.* **2017**, *8*, 7912-7922.
- (17) Cole, C. M.; Brea, R. J.; Kim, Y. H.; Hardy, M. D.; Yang, J.; Devaraj, N. K. Spontaneous Reconstitution of Functional Transmembrane Proteins during Bioorthogonal Phospholipid Membrane Synthesis. *Angew. Chem. Int. Ed.* **2015**, *54*, 12738-12742.
- (18) Brea, R. J.; Cole, C. M.; Lyda, B. R.; Ye, L.; Prosser, R. S.; Sunahara, R. K.; Devaraj, N. K. In Situ Reconstitution of the Adenosine A<sub>2A</sub> Receptor in Spontaneously Formed Synthetic Liposomes. *J. Am. Chem. Soc.* **2017**, *139*, 3607-3610.
- (19) Iwasaki, Y.; Yamane, T. Enzymatic Synthesis of Structured Lipids. *Adv. Biochem. Eng. Biotechnol.* **2004**, *90*, 151-171.
- (20) Radmacher, E.; Alderwick, L. J.; Besra, G. S.; Brown, A. K.; Gibson, K. J. C.; Sahn, H.; Eggeling, L. Two Functional FAS-I Type Fatty Acid Synthases in *Corynebacterium glutamicum*. *Microbiology* **2005**, *151*, 2421-2427.
- (21) Haushalter, R. W.; Groff, D.; Deutsch, S.; The, L.; Chavkin, T. A.; Brunner, S. F.; Katz, L.; Keasling, J. D. Development of an Orthogonal Fatty Acid Biosynthesis System in *E. coli* for Oleochemical Production. *Metab. Eng.* **2015**, *30*, 1-6.
- (22) Seoane, A. A.; Brea, R. J.; Fuentès, A.; Podolsky, K. A.; Devaraj, N. K. Biomimetic Generation and Remodeling of Phospholipid Membranes by Dynamic Imine Chemistry. *J. Am. Chem. Soc.* **2018**, *140*, 8388-8391.
- (23) Krause, M. R.; Regen, S. L. The Structural Role of Cholesterol in Cell Membranes: From Condensed Bilayers to Lipid Rafts. *Acc. Chem. Res.* **2014**, *47*, 3512-3521.
- (24) Douliez, J. P.; Houinsou-Houssou, B.; Fameau, A. L.; Novales, B.; Gaillard, C. Self Assembly of Anastomosis-like Superstructures in Fatty Acid/Guanidine Hydrochloride Aqueous Dispersions. *J. Colloid Interface Sci.* **2010**, *341*, 386-389.
- (25) Fameau, A. L.; Houinsou-Houssou, B.; Ventureira, J. L.; Navailles, L.; Nallet, F.; Novales, B.; Douliez, J. P. Self-Assembly, Foaming, and Emulsifying Properties of Sodium Alkyl Carboxylate/Guanidine Hydrochloride Aqueous Mixtures. *Langmuir* **2011**, *27*, 4505-4513.
- (26) Douliez, J. P.; Houssou, B. H.; Fameau, A. L.; Navailles, L.; Nallet, F.; Grélard, A.; Dufourc, E. J.; Gaillard, C. Self-Assembly of Bilayer Vesicles Made of Saturated Long Chain Fatty Acids. *Langmuir* **2016**, *32*, 401-410.
- (27) Suryabrahmam, B.; Agrawal, A.; Raghunathan, V. A. Fluid-Fluid Coexistence in Phospholipid Membranes Induced by Decanol. *Soft Matter* **2020**, *16*, 9002-9005.
- (28) Kaneda, T. Fatty Acids of the Genus *Bacillus*: An Example of Branched Chain Preference. *Bacteriol. Rev.* **1977**, *41*, 391-418.
- (29) Kaneda, T. Iso- and Anteiso-Fatty Acids in Bacteria: Biosynthesis, Function, and Taxonomic Significance. *Microbiol. Rev.* **1991**, *55*, 288-302.
